# Supplementary material
Source: MDPI journal article supplement (https://www.mdpi.com/2571-9408/6/6/237)
Supplement: s1 [file s1]

**Table S1.** Key laws and regulations related to karst conservation and management in China.

| First Enacted Time | Title                                                                       | Amended and Revised Time                          | Level    |
|--------------------|-----------------------------------------------------------------------------|---------------------------------------------------|----------|
| 1979               | Environmental Protection Law (for Trial Implementation)                     | Revised in 1989 and 2014                          | National |
| 1979               | Forestry Law (for Trial Implementation)                                     | Revised in 1984 and 1998, 2009, and 2019          | National |
| 1982               | Law on Protection Cultural Relics                                           | Revised in 1991, 2002, 2007, 2013, 2015, and 2017 | National |
| 1982               | Marine Environment Protection Law                                           | Revised in 2013, 2016                             | National |
| 1984               | Law on Prevention and Control of Water Pollution                            | Amended in 1996, 2008, and 2018                   | National |
| 1985               | Grassland Law                                                               | Revised in 2002, 2009, 2013, and 2021             | National |
| 1986               | Fisheries Law                                                               | Revised in 2000, 2004, 2009, 2013                 | National |
| 1986               | Mineral Resources Law                                                       | Revised in 1996 and 2009                          | National |
| 1986               | Land Administration Law                                                     | Revised in 1988, 1998, 2004, and 2019             | National |
| 1987               | Customs Law                                                                 | Revised in 2000, 2013, 2016, 2017, and 2021       | National |
| 1988               | Water Law                                                                   | Revised in 2002, 2009, and 2016                   | National |
| 1988               | Law on Prevention and Control of Atmospheric Pollution                      | Amended in 1995, 2000, 2016, and 2018             | National |
| 1988               | Law on the Protection of Wildlife                                           | Revised in 2004, 2009, 2016, 2018, and 2022       | National |
| 1991               | Law on Water and Soil Conservation                                          | Amended in 2010                                   | National |
| 1992               | Surveying and Mapping Law                                                   | Revised in 2002 and 2017                          | National |
| 1992               | Law on the Territorial Sea and the Contiguous Zone                          |                                                   | National |
| 1993               | Agriculture Law                                                             | Revised in 2002, 2009, and 2012                   | National |
| 1995               | Law on the Prevention and Control of Environmental Pollution by Solid Waste | Amended in 2004, 2013, 2015 and 2020              | National |
| 1996               | Law on the Coal Industry                                                    | Revised in 2009, 2011, 2013, and 2016             | National |
| 1996               | Law on Prevention and Control of Pollution from Environmental Noise         | Revised in 2004, 2018, and 2021                   | National |
| 1997               | Flood Control Law                                                           | Revised in 2009, 2015, and 2016                   | National |
| 1998               | Law on the Exclusive Economic Zone and the Continental Shelf                |                                                   | National |
| 1999               | Meteorology Law                                                             | Revised in 2009, 2014, and 2016                   | National |
| 2001               | Law on Desert Prevention and Transformation                                 | Revised in 2018                                   | National |
| 2003               | Environmental Impact Assessment Law                                         | Revised in 2016 and 2018                          | National |
| 2005               | Animal Husbandry Law                                                        | Revised in 2015 and 2022                          | National |
| 2007               | Law on Urban and Rural Planning                                             | Revised in 2019                                   | National |
| 2008               | Circular Economy Promotion Law                                              | Revised in 2018                                   | National |

|      |                                                                                                                               |                                       |              |
|------|-------------------------------------------------------------------------------------------------------------------------------|---------------------------------------|--------------|
| 2011 | Law on Intangible Cultural Heritage                                                                                           |                                       | National     |
| 2013 | Tourism Law                                                                                                                   | Revised in 2016 and 2018              | National     |
| 2018 | Prevention and Control of Soil Pollution Law                                                                                  |                                       | National     |
| 2018 | Law on Environmental Protection Tax                                                                                           |                                       | National     |
| 2018 | Nuclear Safety Law                                                                                                            |                                       | National     |
| 2019 | Resource Tax Law                                                                                                              |                                       | National     |
| 2020 | Law on Yangtze River Conservation                                                                                             |                                       | National     |
| 2021 | Wetlands Conservation Law                                                                                                     |                                       | National     |
| 2022 | Law on Black Soil Conservation                                                                                                |                                       | National     |
| 2022 | Law on Yellow River Conservation                                                                                              |                                       | National     |
| 1994 | Regulations on Nature Reserves                                                                                                | Revised in 2011 and 2017              | National     |
| 2010 | Regulations on the Protection of Paleontological Fossils                                                                      | Revised in 2019                       | National     |
| 1995 | Regulations on Geological Sites Protection                                                                                    |                                       | Departmental |
| 2006 | Management Measures of World Cultural Heritage Protection                                                                     |                                       | Departmental |
| 2018 | Management Measures of National-level Cultural Ecological Reserve                                                             |                                       | Departmental |
| 2015 | Management Measures of World Natural Heritage, Natural and Cultural Heritage Nomination and Protection (trial implementation) |                                       | Departmental |
| 1999 | Regulation of Guangxi on Scenic Spots Management                                                                              | Revised in 2004, 2010, and 2016       | Guangxi      |
| 2002 | Regulation of Guangxi on Stalactite Resources Protection                                                                      | Revised in 2004, 2009, 2016, and 2020 | Guangxi      |
| 2011 | Regulation of Guangxi Zhuang Autonomous Region on Lijiang River Basin Ecological Protection                                   |                                       | Guangxi      |
| 2014 | Administrative Measures of Guangxi for the Protection of Lingqu                                                               |                                       | Guangxi      |
| 2017 | Regulation of Guilin on Stone Carving Protection                                                                              |                                       | Guilin       |
| 2020 | Regulation of Guilin on Lijiang River Scenic Spots Management                                                                 |                                       | Guilin       |
| 2022 | Regulation of Guilin on the Sustainable Use of Karst Landscape Resources                                                      |                                       | Guilin       |
| 2022 | Regulation of Guilin on Lingqu Protection                                                                                     |                                       | Guilin       |

**Table S2.** Abbreviations of full list institutions.

| <b>No.</b> | <b>Level</b> | <b>Abbreviation</b> | <b>English Full Name</b>                                                             |
|------------|--------------|---------------------|--------------------------------------------------------------------------------------|
| 1          | National     | NPC                 | National People's Congress                                                           |
| 2          | National     | SC                  | State Council                                                                        |
| 3          | National     | ERPC                | Environment and Resource Protection Committee                                        |
| 4          | National     | LC                  | Legal Committee                                                                      |
| 5          | National     | MNR                 | Ministry of Natural Resources                                                        |
| 6          | National     | MCT                 | Ministry of Culture and Tourism                                                      |
| 7          | National     | MHURD               | Ministry of Housing and Urban-rural Development                                      |
| 8          | National     | NDRC                | National Development and Reform Commission                                           |
| 9          | National     | MEE                 | Ministry of Ecology and Environment                                                  |
| 10         | National     | MWR                 | Ministry of Water Resources                                                          |
| 11         | National     | MFA                 | Ministry of Foreign Affairs                                                          |
| 12         | National     | MIIT                | Ministry of Industry and Information Technology                                      |
| 13         | National     | MARA                | Ministry of Agriculture and Rural Affairs                                            |
| 14         | National     | MoF                 | Ministry of Finance                                                                  |
| 15         | National     | MoST                | Ministry of Science and Technology                                                   |
| 16         | National     | MOE                 | Ministry of Education                                                                |
| 17         | National     | MoT                 | Ministry of Transport                                                                |
| 18         | National     | CAS                 | Chinese Academy of Sciences                                                          |
| 19         | National     | MPS                 | Ministry of Public Security                                                          |
| 20         | National     | MEM                 | Ministry of Emergency Management                                                     |
| 21         | National     | MoJ                 | Ministry of Justice                                                                  |
| 22         | National     | MoC                 | Ministry of Commerce                                                                 |
| 23         | National     | MCA                 | Ministry of Civil Affairs                                                            |
| 24         | National     | NHC                 | National Health Commission                                                           |
| 25         | National     | NEAS                | National Ethnic Affairs Commission                                                   |
| 26         | National     | SASAC               | State-owned Assets Supervision and Administration<br>Commission of the State Council |
| 27         | National     | CAC                 | Central Administration of Customs                                                    |
| 28         | National     | SAMR                | State Administration for Market Regulation                                           |
| 29         | National     | NRTA                | National Radio and Television Administration                                         |
| 30         | National     | NBS                 | National Bureau of Statistics                                                        |
| 31         | National     | NFGA                | National Forestry and Grassland Administration                                       |
| 32         | National     | CNIPA               | China National Intellectual Property Administration                                  |
| 33         | National     | XNA                 | Xinhua News Agency                                                                   |
| 34         | National     | CMA                 | China Meteorological Administration                                                  |
| 35         | National     | NEA                 | National Energy Administration                                                       |
| 36         | National     | NRA                 | National Railway Administration                                                      |
| 37         | National     | CAA                 | Civil Aviation Administration                                                        |
| 38         | National     | NCHA                | National Cultural Heritage Administration                                            |
| 39         | National     | NATCM               | National Administration of Traditional Chinese Medicine                              |
| 40         | National     | CGS                 | China Geological Survey                                                              |
| 41         | National     | SOA                 | State Oceanic Administration                                                         |
| 42         | National     | PRWRC               | Pearl River Water Resources Commission of the MWR                                    |
| 43         | National     | PD                  | People's Daily                                                                       |
| 44         | National     | CAST                | China Association for Science and Technology                                         |
| 45         | National     | GSC                 | Geological Society of China                                                          |
| 46         | National     | ASC                 | Archaeology Society of China                                                         |
| 47         | National     | ICOMOS China        | Chinese National Committee for the International<br>Council on Monuments and Sites   |
| 48         | National     | GeSC                | The Geographical Society of China                                                    |
| 49         | National     | CSNR                | China Society of Natural Resources                                                   |
| 50         | National     | CFCHC               | China Foundation For Cultural Heritage Conservation                                  |
| 51         | National     | CCT                 | China Chamber of Tourism                                                             |
| 52         | National     | IAH-CNC             | International Association of Hydrogeologists China<br>National Chapter               |
| 53         | National     | IRCK                | International Research Center on Karst under the<br>Auspices of UNESCO               |
| 54         | National     | ESC                 | Ecological Society of China                                                          |

|     |            |           |                                                                         |
|-----|------------|-----------|-------------------------------------------------------------------------|
| 55  | National   | CACTCH    | China Association for Conservation Technology of Cultural Heritage      |
| 56  | National   | CSSWC     | China Society of Soil and Water Conservation                            |
| 57  | National   | CHSLA     | Chinese Society of Landscape Architecture                               |
| 58  | National   | CSSD      | Chinese Society for Sustainable Development                             |
| 59  | National   | CLSS      | China Land Science Society                                              |
| 60  | National   | CBCGDF    | China Biodiversity Conservation and Green Development Foundation        |
| 61  | National   | CASE      | China Association for Scientific Expedition                             |
| 62  | National   | CTA       | China Tourism Association                                               |
| 63  | National   | CTAA      | China Tourist Attractions Association                                   |
| 64  | National   | CSES      | Chinese Society for Environmental Sciences                              |
| 65  | National   | CUGB      | China University of Geosciences, Beijing                                |
| 66  | National   | CAGS      | Chinese Academy of Geological Sciences                                  |
| 67  | National   | IKGCAGS   | Institute of Karst Geology, Chinese Academy of Geological Sciences      |
| 68  | National   | GZU       | Guizhou University                                                      |
| 69  | National   | GZNU      | Guizhou Normal University                                               |
| 70  | National   | YNU       | Yunnan University                                                       |
| 71  | National   | IGSNRRCAS | Institute of Geographic Sciences and Natural Resources Research, CAS    |
| 72  | National   | IGCAS     | Institute of Geochemistry, Chinese Academy of Sciences                  |
| 73  | National   | ISACAS    | Institute of Subtropical Agriculture, The Chinese Academy of Sciences   |
| 74  | National   | IRSMCAS   | Institute of Rock and Soil Mechanics, Chinese Academy of Sciences       |
| 75  | National   | TJU       | Tianjin University                                                      |
| 76  | National   | SWU       | Southwest University                                                    |
| 77  | Provincial | GXPC      | People's Congress                                                       |
| 78  | Provincial | GXPG      | People's Government of Guangxi Zhuang Autonomous Region                 |
| 79  | Provincial | GXDRC     | Development and Reform Commission of Guangxi                            |
| 80  | Provincial | GXED      | Education Department of Guangxi                                         |
| 81  | Provincial | GXSTD     | Science and Technology Department                                       |
| 82  | Provincial | GXDIIT    | Department of Industry and Information Technology of Guangxi            |
| 83  | Provincial | GXERAC    | Ethnic and Religious Affairs Commission of Guangxi                      |
| 84  | Provincial | GXPSD     | Guangxi Public Security Department                                      |
| 85  | Provincial | GXCAD     | Guangxi Civil Affairs Department                                        |
| 86  | Provincial | GXJD      | Justice Department                                                      |
| 87  | Provincial | GXFD      | Finance Department                                                      |
| 88  | Provincial | GXHRSSD   | Human Resources and Social Security Department                          |
| 89  | Provincial | GXDNR     | Department of Natural Resources                                         |
| 90  | Provincial | GXDEE     | Department of Ecology and Environment                                   |
| 91  | Provincial | GXDHUD    | Department of Housing and Urban-rural Development                       |
| 92  | Provincial | GXDT      | Guangxi Department of Transportation                                    |
| 93  | Provincial | GXWRD     | Water Resources Department                                              |
| 94  | Provincial | GXDARA    | Department of Agriculture and Rural Affairs                             |
| 95  | Provincial | GXDC      | Department of Commerce                                                  |
| 96  | Provincial | GXDCT     | Department of Culture and Tourism                                       |
| 97  | Provincial | GXHC      | Health Committee                                                        |
| 98  | Provincial | GXEMO     | Emergency Management Office                                             |
| 99  | Provincial | GXFAO     | Foreign Affairs Office                                                  |
| 100 | Provincial | GXSASAC   | State-owned Assets Supervision and Administration Commission of Guangxi |
| 101 | Provincial | GXAMR     | Administration of Market Regulation                                     |
| 102 | Provincial | GXART     | Administration of Radio and Television                                  |
| 103 | Provincial | GXBS      | Bureau of Statistics Guangxi                                            |
| 104 | Provincial | GXDF      | Department of Forestry of Guangxi                                       |
| 105 | Provincial | GXRRB     | Rural Revitalization Bureau                                             |
| 106 | Provincial | GXGMSAC   | Guangxi Maritime Safety Administration of China                         |
| 107 | Provincial | GXBDDb    | Big Data Development Bureau                                             |

|     |            |         |                                                              |
|-----|------------|---------|--------------------------------------------------------------|
| 108 | Provincial | GXOA    | Guangxi Oceanic Administration                               |
| 109 | Provincial | GXAST   | Guangxi Science and Technology Association                   |
| 110 | Provincial | GXLSC   | Guangxi Land Science Society                                 |
| 111 | Provincial | GSG     | Geological Society of Guangxi                                |
| 112 | Provincial | GXMS    | Guangxi Mining Society                                       |
| 113 | Provincial | GXES    | Guangxi Ecological Society                                   |
| 114 | Provincial | GXSES   | Guangxi Society for Environmental Sciences                   |
| 115 | Provincial | GXHES   | Guangxi Hydraulic Engineering Society                        |
| 116 | Provincial | GXSGPC  | Guangxi Society for Geodesy Photogrammetry and Cartography   |
| 117 | Provincial | GXSF    | Guangxi Society of Forestry                                  |
| 118 | Provincial | GXSHS   | Guangxi Society for Horticultural Science                    |
| 119 | Provincial | GXSRS   | Guangxi Society for Remote Sensing                           |
| 120 | Provincial | GXU     | Guangxi University                                           |
| 121 | Provincial | GXUFE   | Guangxi University of Finance and Economics                  |
| 122 | Provincial | GLUT    | Guilin University of Technology                              |
| 123 | Provincial | GXNU    | Guangxi Normal University                                    |
| 124 | Provincial | GXUN    | Guangxi University for Nationalities                         |
| 125 | Municipal  | GLPC    | Guilin People's Congress                                     |
| 126 | Municipal  | GLPG    | Guilin People's Government                                   |
| 127 | Municipal  | GLDRC   | Guilin Development and Reform Commission                     |
| 128 | Municipal  | GLEB    | Education Bureau of Guilin                                   |
| 129 | Municipal  | GLSTB   | Science and Technology Bureau                                |
| 130 | Municipal  | GLBIIT  | Bureau of Industry and Information Technology of Guilin      |
| 131 | Municipal  | GLERAC  | Ethnic and Religious Affairs Commission of Guilin            |
| 132 | Municipal  | GLPSD   | Guilin Public Security Bureau                                |
| 133 | Municipal  | GLCAD   | Guilin Civil Affairs Bureau                                  |
| 134 | Municipal  | GLJD    | Justice Bureau                                               |
| 135 | Municipal  | GLFD    | Finance Bureau                                               |
| 136 | Municipal  | GLHRSSB | Human Resources and Social Security Bureau                   |
| 137 | Municipal  | GLBNR   | Bureau of Natural Resources                                  |
| 138 | Municipal  | GLBEE   | Bureau of Ecology and Environment                            |
| 139 | Municipal  | GLBHUD  | Bureau of Housing and Urban-rural Development                |
| 140 | Municipal  | GLBT    | Guangxi Bureau of Transportation                             |
| 141 | Municipal  | GLWRB   | Water Resources Bureau                                       |
| 142 | Municipal  | GLBARA  | Bureau of Agriculture and Rural Affairs                      |
| 143 | Municipal  | GLBC    | Bureau of Commerce                                           |
| 144 | Municipal  | GLHC    | Health Committee                                             |
| 145 | Municipal  | GLEMB   | Emergency Management Bureau                                  |
| 146 | Municipal  | GLBS    | Bureau of Statistics Guilin                                  |
| 147 | Municipal  | GLBCRTT | Bureau of Culture, Radio, Television and Tourism             |
| 148 | Municipal  | GLBMR   | Bureau of Market Regulation                                  |
| 149 | Municipal  | GLBFL   | Bureau of Forestry and Landscape                             |
| 150 | Municipal  | GLUMC   | Urban Management Commission                                  |
| 151 | Municipal  | GLSASAC | State-owned Assets Supervision and Administration Commission |
| 152 | Municipal  | GLMSA   | Maritime Safety Administration                               |
| 153 | Municipal  | GLBC    | Bureau of Customs                                            |
| 154 | Municipal  | LPSB    | Lijiang Public Security Bureau                               |
| 155 | Municipal  | GLRSMC  | Guilin Lijiang River Scenic Management Committee             |
| 156 | Municipal  | YSCG    | Yangshou County Government                                   |
| 157 | Municipal  | PLCG    | Pingle County Government                                     |
| 158 | Municipal  | XACG    | Xing'an County Government                                    |
| 159 | Municipal  | LCCG    | Lingchuan County Government                                  |
| 160 | Municipal  | QZCG    | Quanzhou County Government                                   |
| 161 | Municipal  | LGDG    | Lingui District Government                                   |
| 162 | Municipal  | QXDG    | Qixing District Government                                   |
| 163 | Municipal  | XFDG    | Xiufeng District Government                                  |
| 164 | Municipal  | XSDG    | Xiangshan District Government                                |
| 165 | Municipal  | DCDG    | Diecai District Government                                   |
| 166 | Municipal  | YSDG    | Yanshan District Government                                  |
| 167 | Municipal  | GLAST   | Guilin Science and Technology Association                    |

|     |           |           |                                                                                    |
|-----|-----------|-----------|------------------------------------------------------------------------------------|
| 168 | Municipal | GLFSS     | Guilin Federation of Social Sciences                                               |
| 169 | Municipal | GLTAA     | Guilin Travel Agency Association                                                   |
| 170 | Municipal | GLSES     | Guilin Society for Environmental Sciences                                          |
| 171 | Municipal | GLFIA     | Guilin Forestry Industry Association                                               |
| 172 | Municipal | GLREHCCRA | Guilin Lijiang River Ecological Human Culture<br>Conservation Research Association |
| 173 | Municipal | GLEPIS    | Guilin Environmental Protection Industry Association                               |
| 174 | Municipal | GLTAA     | Guilin Tourist Attractions Association                                             |
| 175 | Municipal | GSGL      | Geological Society of Guilin                                                       |
| 176 | Municipal | GLHES     | Guilin Hydraulic Engineering Society                                               |
| 177 | Municipal | GLAST     | Guilin Landscape Architecture Society                                              |
| 178 | Municipal | GLSF      | Guilin Society of Forestry                                                         |
| 179 | Municipal | GLTU      | Guilin Tourism University                                                          |
